# Supplementary material for: Surveying Bat-Hosted Adenoviruses and Herpesviruses: A Comprehensive Analysis
Source: MDPI journal article supplement (doi:10.3390/d16010046), 2024-01-11
Supplement: s1 [file s1]

## Supplementary Materials

**Table S1.** Search engine and keywords used.

| Databases and search engine                                                              | Keywords                                                                                                                                                                                    |
|------------------------------------------------------------------------------------------|---------------------------------------------------------------------------------------------------------------------------------------------------------------------------------------------|
| <b>Scopus</b><br><b>SciELO</b><br><b>CABI</b><br><b>DBatVir</b><br><b>Google Scholar</b> | <b>Hepeviridae</b><br>"Herpesvirus AND Bat"<br>"Herpesviridae AND Bat"<br>"Virome AND Bat"<br><br><b>Adenoviridae</b><br>"Adenovirus AND Bat"<br>"Adenoviridae AND Bat"<br>"Virome AND Bat" |

**Table S2.** Data extracted from each article that was included in the review.

| Description of the papers                                                                 | Bats                                  | Virus                                                           |
|-------------------------------------------------------------------------------------------|---------------------------------------|-----------------------------------------------------------------|
| 1. Title                                                                                  | 10. Taxonomy                          | 16. Taxonomy                                                    |
| 2. Year                                                                                   | 11. Place of collection               | 17. Detection method                                            |
| 3. Journal                                                                                | 12. Year or years of sampling         | 18. Number of new viruses identified                            |
| 4. Authors                                                                                | 13. Number of individuals per species | 19. Number of total viruses identified                          |
| 5. Locality of the institution of the main author                                         | 14. Type of sample analyzed           | 20. Number of positive and negative individuals                 |
| 6. Scientific area of study (virology, ecology, microbiology, Medicine, monitoring, etc.) | 15. IUCN category                     | 21. Prevalence (Number of positive/Total number of individuals) |
| 7. Main conclusion                                                                        |                                       |                                                                 |
| 8. Journal impact factor                                                                  |                                       |                                                                 |
| 9. Number of citation in the papers                                                       |                                       |                                                                 |

**Table S3.** Conservation status by IUCN red list category of the bat species.

| <b>Categories</b>     | <b>Abbreviation</b> | <b>No. bat species studied</b> | <b>No. bat species positive</b> |
|-----------------------|---------------------|--------------------------------|---------------------------------|
| Not Evaluated         | NE                  | 4                              | 4                               |
| Data Deficient        | DD                  | 10                             | 6                               |
| Least Concern         | LC                  | 186                            | 115                             |
| Near Threatened       | NT                  | 19                             | 15                              |
| Vulnerable            | VU                  | 14                             | 10                              |
| Endangered            | EN                  | 6                              | 3                               |
| Critically endangered | CR                  | 0                              | 0                               |
| Extinct in the Wild   | EW                  | 0                              | 0                               |
| Extinct               | EX                  | 0                              | 0                               |

**Table S4.** Bat species positive for adenoviruses (AdVs) and/or herpesviruses (HSVs), indicated by a dark box and information about the conservation category of species in the IUCN, the country where it was found, and the corresponding reference.

| Bat families   | Scientific name                  | IUCN | Country                  | AdV | HSV | Referece        |
|----------------|----------------------------------|------|--------------------------|-----|-----|-----------------|
| Emballonuridae | <i>Coleura afra</i>              | LC   | Kenya                    |     |     | [22]            |
|                | <i>Taphozous melanopogon</i>     | LC   | China                    |     |     | [23]            |
|                | <i>Taphozous perforatus</i>      | LC   | Saudi Arabi              |     |     | [24]            |
|                | <i>Saccopteryx bilineata</i>     | LC   | Peru                     |     |     | [25]            |
|                | <i>Rhynchonycteris naso</i>      | LC   | Peru                     |     |     | [25]            |
| Hipposideridae | <i>Aselliscus stoliczkanus</i>   | LC   | China                    |     |     | [26]            |
|                | <i>Doryrhina cyclops</i>         | LC   | Cameroon                 |     |     | [27]            |
|                | <i>Hipposideros armiger</i>      | LC   | Macau and China          |     |     | [26,28,29]      |
|                | <i>Hipposideros cineraceus</i>   | LC   | China                    |     |     | [26]            |
|                | <i>Hipposideros diadema</i>      | LC   | Philippines              |     |     | [30]            |
|                | <i>Hipposideros jonesi</i>       | NT   | Guinea                   |     |     | [31]            |
|                | <i>Hipposideros larvatus</i>     | LC   | China                    |     |     | [26, 32]        |
|                | <i>Hipposideros pomona</i>       | EN   | China                    |     |     | [26]            |
|                | <i>Hipposideros pratti</i>       | LC   | China                    |     |     | [26]            |
|                | <i>Hipposideros ruber</i>        | LC   | Cameroon                 |     |     | [27]            |
|                | <i>Macronycteris commersonii</i> | NT   | Kenya                    |     |     | [22]            |
|                | <i>Macronycteris gigas</i>       | LC   | Cameroon                 |     |     | [27]            |
| Megadermatidae | <i>Cardioderma cor</i>           | LC   | Kenya                    |     |     | [22]            |
| Miniopteridae  | <i>Miniopterus africanus</i>     | DD   | Kenya                    |     |     | [33]            |
|                | <i>Miniopterus fuliginosus</i>   | NE   | Myanmar, Korea and Japan |     |     | [34-36]         |
|                | <i>Miniopterus minor</i>         | DD   | Kenya                    |     |     | [22]            |
|                | <i>Miniopterus natalensis</i>    | LC   | South Africa             |     |     | [37]            |
|                | <i>Miniopterus orianae</i>       | NE   | Australia                |     |     | [38]            |
|                | <i>Miniopterus schreibersii</i>  | VU   | Spain, China and Croatia |     |     | [23, 32, 39-42] |

Table S4. Continue

| Bat families   | Scientific name               | IUCN | Country                                      | AdV | HSV | Reference    |
|----------------|-------------------------------|------|----------------------------------------------|-----|-----|--------------|
| Molossidae     | <i>Chaerephon plicata</i>     | LC   | China                                        |     |     | [26]         |
|                | <i>Chaerephon pumilus</i>     | LC   | Cameroon                                     |     |     | [27]         |
|                | <i>Mops condylurus</i>        | LC   | Cameroon and Guinea                          |     |     | [27, 31]     |
|                | <i>Otomops martiensseni</i>   | NT   | Kenya                                        |     |     | [22, 43]     |
|                | <i>Molossops temminckii</i>   | LC   | Uruguay                                      |     |     | [44]         |
|                | <i>Molossus coibensis</i>     | LC   | French Guiana                                |     |     | [45]         |
|                | <i>Molossus molossus</i>      | LC   | French Guiana, Martinique and Uruguay        |     |     | [44, 45]     |
|                | <i>Molossus rufus</i>         | LC   | Uruguay                                      |     |     | [44]         |
|                | <i>Tadarida brasiliensis</i>  | LC   | Uruguay, Brazil, Argentina and United States |     |     | [44, 46, 47] |
|                | <i>Tadarida teniotis</i>      | LC   | Italy and Spain                              |     |     | [39, 48]     |
| Mormoopidae    | <i>Pteronotus alitonus</i>    | NE   | French Guiana                                |     |     | [45]         |
| Mystacinidae   | <i>Mystacina tuberculata</i>  | VU   | New Zealand                                  |     |     | [49]         |
| Nycteridae     | <i>Nycteris grandis</i>       | LC   | Cameroon                                     |     |     | [27]         |
|                | <i>Nycteris hispida</i>       | LC   | Cameroon                                     |     |     | [27]         |
|                | <i>Nycteris macrotis</i>      | LC   | Guinea                                       |     |     | [31]         |
| Phyllostomidae | <i>Anoura geoffroyi</i>       | LC   | French Guiana                                |     |     | [45]         |
|                | <i>Artibeus lituratus</i>     | LC   | Peru                                         |     |     | [25]         |
|                | <i>Artibeus planirostris</i>  | LC   | French Guiana                                |     |     | [45]         |
|                | <i>Carollia perspicillata</i> | LC   | French Guiana                                |     |     | [45]         |

Table S4. Continue

| Bat families   | Scientific name                  | IUCN | Country                                           | AdV | HSV | Reference                |
|----------------|----------------------------------|------|---------------------------------------------------|-----|-----|--------------------------|
| Phyllostomidae | <i>Desmodus rotundus</i>         | LC   | Peru, Mexico, French Guiana, Brazil and Guatemala |     |     | [25, 43, 44, 50-53]      |
|                | <i>Diaemus youngi</i>            | LC   | French Guiana                                     |     |     | [45]                     |
|                | <i>Diphylla ecaudata</i>         | LC   | Peru and Mexico                                   |     |     | [25, 52]                 |
|                | <i>Glossophaga soricina</i>      | LC   | Peru                                              |     |     | [25]                     |
|                | <i>Leptonycteris yerbabuenae</i> | NT   | Mexico                                            |     |     | [54]                     |
|                | <i>Lonchophylla thomasi</i>      | LC   | Brazil                                            |     |     | [55]                     |
|                | <i>Macrotus waterhousii</i>      | LC   | Mexico                                            |     |     | [56]                     |
|                | <i>Sturnira angeli</i>           | NT   | Martinique                                        |     |     | [45]                     |
|                | <i>Sturnira lilium</i>           | LC   | Peru                                              |     |     | [25]                     |
|                | <i>Sturnira tildae</i>           | LC   | French Guiana                                     |     |     | [45]                     |
| Pteropodidae   | <i>Acerodon celebensis</i>       | VU   | Indonesia                                         |     |     | [57, 58]                 |
|                | <i>Cynopterus sphinx</i>         | LC   | China                                             |     |     | [23, 26, 32, 42]         |
|                | <i>Cynopterus brachyotis</i>     | LC   | Philippines                                       |     |     | [59]                     |
|                | <i>Dobsonia moluccensis</i>      | LC   | Indonesia                                         |     |     | [58]                     |
|                | <i>Eidolon dupreanum</i>         | VU   | Madagascar                                        |     |     | [55]                     |
|                | <i>Eidolon helvum</i>            | NT   | Kenya, Zambia, Cameroon, Ghana and Nigeria        |     |     | [22, 27, 43, 55, 60, 61] |
|                | <i>Eonycteris spelaea</i>        | LC   | Singapore                                         |     |     | [62]                     |
|                | <i>Epomops franqueti</i>         | LC   | Cameroon                                          |     |     | [27]                     |
|                | <i>Hypsignathus monstrosus</i>   | LC   | Cameroon                                          |     |     | [27]                     |
|                | <i>Lissonycteris angolensis</i>  | LC   | Cameroon                                          |     |     | [27]                     |
|                | <i>Macroglossus minimus</i>      | LC   | Philippines                                       |     |     | [59]                     |
|                | <i>Megaloglossus woermanni</i>   | LC   | Cameroon                                          |     |     | [27]                     |
|                | <i>Micropteropus pusillus</i>    | LC   | Cameroon                                          |     |     | [27]                     |

**Table S4.** Continue

| Bat families  | Scientific name                  | IUCN | Sample                                           | AdV | HSV | Reference                   |
|---------------|----------------------------------|------|--------------------------------------------------|-----|-----|-----------------------------|
| Pteropodidae  | <i>Ptenochirus jagori</i>        | LC   | Philippines                                      |     |     | [59]                        |
|               | <i>Pteropus dasymallus</i>       | VU   | Japan                                            |     |     | [63]                        |
|               | <i>Pteropus lylei</i>            | VU   | Cambodia and Vietnam                             |     |     | [55, 64]                    |
|               | <i>Pteropus medius</i>           | LC   | Bangladesh                                       |     |     | [65]                        |
|               | <i>Pteropus poliocephalus</i>    | VU   | Australia                                        |     |     | [66]                        |
|               | <i>Pteropus vampyrus</i>         | NT   | Indonesia and United States                      |     |     | [57, 58, 67]                |
|               | <i>Rousettus aegyptiacus</i>     | LC   | Kenya, Cameroon, Hungary, Spain and South Africa |     |     | [22, 27, 37, 39, 68, 69]    |
|               | <i>Rousettus amplexicaudatus</i> | LC   | Philippines                                      |     |     | [59]                        |
|               | <i>Rousettus leschenaultii</i>   | NT   | India and China                                  |     |     | [26, 32, 40, 70, 71]        |
| Rhinolophidae | <i>Rhinolophus affinis</i>       | LC   | China                                            |     |     | [26]                        |
|               | <i>Rhinolophus alcyone</i>       | LC   | Cameroon                                         |     |     | [27]                        |
|               | <i>Rhinolophus blythi</i>        | LC   | China                                            |     |     | [23]                        |
|               | <i>Rhinolophus cornutus</i>      | NE   | Japan                                            |     |     | [72]                        |
|               | <i>Rhinolophus euryale</i>       | NT   | Spain and Hungary                                |     |     | [73, 74]                    |
|               | <i>Rhinolophus ferrumequinum</i> | LC   | China, Japan, Spain, Croatia and Hungary         |     |     | [26, 39, 41, 73, 74 75, 76] |
|               | <i>Rhinolophus fumigatus</i>     | LC   | Kenya and Cameroon                               |     |     | [22, 27]                    |
|               | <i>Rhinolophus hipposideros</i>  | LC   | China, Spain, Hungary and Switzerland            |     |     | [26, 39, 73, 77]            |
|               | <i>Rhinolophus lepidus</i>       | LC   | China                                            |     |     | [26]                        |
|               | <i>Rhinolophus pusillus</i>      | LC   | China                                            |     |     | [26, 78, 79]                |
|               | <i>Rhinolophus rex</i>           | EN   | China                                            |     |     | [26]                        |
|               | <i>Rhinolophus rouxii</i>        | LC   | China                                            |     |     | [26]                        |

**Table S4.** Continue

| Bat families     | Scientific name                 | IUCN | Sample                                   | AdV | HSV | Bibliographical reference |
|------------------|---------------------------------|------|------------------------------------------|-----|-----|---------------------------|
| Rhinolophidae    | <i>Rhinolophus rufus</i>        | NT   | Philippines                              |     |     | [59]                      |
|                  | <i>Rhinolophus sinicus</i>      | LC   | China                                    |     |     | [26, 40]                  |
| Rhinonycteridae  | <i>Triaenops persicus</i>       | LC   | Congo                                    |     |     | [80]                      |
| Vespertilionidae | <i>Barbastella barbastellus</i> | NT   | Slovakia                                 |     |     | [81]                      |
|                  | <i>Barbastella beijingensis</i> | DD   | China                                    |     |     | [26]                      |
|                  | <i>Chalinolobus gouldii</i>     | LC   | Australia                                |     |     | [82]                      |
|                  | <i>Chalinolobus morio</i>       | LC   | Australia                                |     |     | [82]                      |
|                  | <i>Corynorhinus rafinesquii</i> | LC   | United States                            |     |     | [83]                      |
|                  | <i>Eptesicus diminutus</i>      | LC   | Uruguay                                  |     |     | [44]                      |
|                  | <i>Eptesicus furinalis</i>      | LC   | Uruguay                                  |     |     | [44]                      |
|                  | <i>Eptesicus fuscus</i>         | LC   | United States and Canada                 |     |     | [84-86]                   |
|                  | <i>Eptesicus isabellinus</i>    | LC   | Spain                                    |     |     | [39]                      |
|                  | <i>Eptesicus nilssonii</i>      | LC   | Germany                                  |     |     | [73]                      |
|                  | <i>Eptesicus serotinus</i>      | LC   | Spain, China, Italy, Hungary and Germany |     |     | [39, 47, 73, 87, 88]      |
|                  | <i>Hypsugo musciculus</i>       | DD   | Cameroon                                 |     |     | [27]                      |
|                  | <i>Hypsugo savii</i>            | LC   | Spain and Italy                          |     |     | [39, 48, 74]              |
|                  | <i>Ia io</i>                    | NT   | China                                    |     |     | [26]                      |
|                  | <i>Murina leucogaster</i>       | LC   | China                                    |     |     | [26]                      |
|                  | <i>Myotis alcathoe</i>          | DD   | Spain and China                          |     |     | [39]                      |
|                  | <i>Myotis altarium</i>          | LC   | China                                    |     |     | [26]                      |
|                  | <i>Myotis bechsteinii</i>       | NT   | Spain                                    |     |     | [39, 74]                  |
|                  | <i>Myotis blythii</i>           | LC   | Hungary                                  |     |     | [39, 73, 81]              |

**Table S4.** Continue

| Bat families     | Scientific name             | IUCN | Sample                                                 | AdV | HSV | Reference                            |
|------------------|-----------------------------|------|--------------------------------------------------------|-----|-----|--------------------------------------|
| Vespertilionidae | <i>Myotis brandtii</i>      | LC   | Sweden                                                 |     |     | [89]                                 |
|                  | <i>Myotis capaccinii</i>    | VU   | Spain                                                  |     |     | [39]                                 |
|                  | <i>Myotis dasycneme</i>     | NT   | Hungary                                                |     |     | [73]                                 |
|                  | <i>Myotis daubentonii</i>   | LC   | Spain, Germany and China                               |     |     | [26, 39, 90]                         |
|                  | <i>Myotis emarginatus</i>   | LC   | Croatia, Spain and Hungary                             |     |     | [73, 74]                             |
|                  | <i>Myotis escaleraei</i>    | LC   | Spain                                                  |     |     | [39]                                 |
|                  | <i>Myotis fimbriatus</i>    | LC   | China                                                  |     |     | [88, 91]                             |
|                  | <i>Myotis horsfieldii</i>   | LC   | China                                                  |     |     | [28]                                 |
|                  | <i>Myotis macrodactylus</i> | LC   | Japan                                                  |     |     | [92]                                 |
|                  | <i>Myotis lucifugus</i>     | EN   | United States                                          |     |     | [93]                                 |
|                  | <i>Myotis myotis</i>        | LC   | Croatia, Germany, China, Spain, Hungary and Switzerlad |     |     | [26, 39, 41, 73, 74, 77, 87, 94, 95] |
|                  | <i>Myotis mystacinus</i>    | LC   | Spain, Switzerlad and Germany                          |     |     | [39, 73, 87, 90, 96]                 |
|                  | <i>Myotis nattereri</i>     | LC   | France, Germany and Croatia                            |     |     | [41, 87, 94, 97]                     |
|                  | <i>Myotis oxyotus</i>       | LC   | Peru                                                   |     |     | [25]                                 |
|                  | <i>Myotis pequinius</i>     | LC   | China                                                  |     |     | [88]                                 |
|                  | <i>Myotis pilosus</i>       | VU   | China                                                  |     |     | [23, 26, 28, 29, 42, 75, 88]         |
|                  | <i>Myotis siligorensis</i>  | LC   | China                                                  |     |     | [26]                                 |
|                  | <i>Myotis velifer</i>       | LC   | United States                                          |     |     | [98, 99]                             |
|                  | <i>Myotis yumanensis</i>    | LC   | United States                                          |     |     | [47]                                 |



**Table S4.** Continue

| Bat families     | Scientific name                  | IUCN | Sample                                          | AdV | HSV | Bibliographical reference    |
|------------------|----------------------------------|------|-------------------------------------------------|-----|-----|------------------------------|
| Vespertilionidae | <i>Neoromicia capensis</i>       | LC   | South Africa                                    |     |     | [100]                        |
|                  | <i>Neoromicia helios</i>         | DD   | South Africa                                    |     |     | [100]                        |
|                  | <i>Neoromicia nana</i>           | LC   | South Africa                                    |     |     | [100]                        |
|                  | <i>Neoromicia tenuipinnis</i>    | LC   | Cameroon                                        |     |     | [27]                         |
|                  | <i>Nyctalus lasiopterus</i>      | VU   | Spain                                           |     |     | [39, 74]                     |
|                  | <i>Nyctalus leisleri</i>         | LC   | Spain and Germany                               |     |     | [39, 73, 74]                 |
|                  | <i>Nyctalus noctula</i>          | LC   | Ukraine, Spain, Switzerlad, Germany and Hungary |     |     | [39, 73, 81, 87, 90, 94, 96] |
|                  | <i>Nyctalus plancyi</i>          | LC   | China                                           |     |     | [26]                         |
|                  | <i>Nyctophilus geoffroyi</i>     | LC   | Australia                                       |     |     | [82]                         |
|                  | <i>Nyctophilus gouldi</i>        | LC   | Australia                                       |     |     | [82]                         |
|                  | <i>Pipistrellus abramus</i>      | LC   | China                                           |     |     | [29]                         |
|                  | <i>Pipistrellus kuhlii</i>       | LC   | Spain, Italy and Germany                        |     |     | [39, 48, 73, 74]             |
|                  | <i>Pipistrellus nanulus</i>      | LC   | Congo                                           |     |     | [80]                         |
|                  | <i>Pipistrellus nathusii</i>     | LC   | Switzerlad and Germany                          |     |     | [73, 87, 96]                 |
|                  | <i>Pipistrellus pipistrellus</i> | LC   | Spain, Switzerlad, Italy and Germany            |     |     | [39, 47, 73, 87, 90, 94, 96] |
|                  | <i>Pipistrellus pygmaeus</i>     | LC   | Spain, Sweden, Hungary and Germany              |     |     | [39, 73, 89]                 |
|                  | <i>Plecotus auritus</i>          | LC   | Germany                                         |     |     | [73, 87, 94]                 |
|                  | <i>Plecotus austriacus</i>       | NT   | Spain                                           |     |     | [39]                         |
|                  | <i>Scotophilus kuhlii</i>        | LC   | China                                           |     |     | [23, 28, 32, 42]             |
|                  | <i>Tylonycteris pachypus</i>     | LC   | China                                           |     |     | [26]                         |

**Table S4.** Continue

| Bat families     | Scientific name               | IUCN | Country                | AdV | HSV | Reference |
|------------------|-------------------------------|------|------------------------|-----|-----|-----------|
| Vespertilionidae | <i>Tylonycteris robustula</i> | LC   | China                  |     |     | [75]      |
|                  | <i>Vespadelus regulus</i>     | LC   | Australia              |     |     | [82]      |
|                  | <i>Vespertilio murinus</i>    | LC   | Germany and Switzerlad |     |     | [73, 77]  |
|                  | <i>Vespertilio sinensis</i>   | LC   | Japan                  |     |     | [92]      |
|                  | <i>Vespertilio superans</i>   | LC   | China                  |     |     | [26]      |

**Table S5.** Prevalence of AdVs and HSVs by species. Including only those articles where the sample size and the number of individuals positive for AdVs and/or HSVs are reported, type of sample analyzed for each viral type, sample size (n), number of positive species (positive) and prevalence (P%).

| Family         | Species                         | AdVs                                        |     |          |       | HSVs                         |    |          |     |
|----------------|---------------------------------|---------------------------------------------|-----|----------|-------|------------------------------|----|----------|-----|
|                |                                 | Samples                                     | n   | Positive | P %   | Samples                      | n  | Positive | P   |
| Emballonuridae | <i>Coleura afra</i>             | Anal swabs                                  | 2   | 0        | 0.0   |                              |    |          |     |
|                | <i>Balantiopteryx plicata</i>   |                                             |     |          |       | Liver                        | 1  | 0        | 0.0 |
|                | <i>Saccopteryx bilineata</i>    |                                             |     |          |       | Oropharyngeal and anal swabs | 1  | 1        | 100 |
|                | <i>Rhynchonycteris naso</i>     |                                             |     |          |       | Oropharyngeal and anal swabs | 1  | 1        | 100 |
|                | <i>Taphozous hildegarde</i>     | Anal swabs                                  | 3   | 0        | 0.0   |                              |    |          |     |
|                | <i>Taphozous melanopogon</i>    | Anal swabs and feces                        | 3   | 1        | 33.3  | Oropharyngeal and anal swabs | 66 | 0        | 0.0 |
|                | <i>Taphozous nudiventris</i>    | Anal swabs                                  | 2   | 0        | 0.0   |                              |    |          |     |
|                | <i>Taphozous perforatus</i>     | Anal swabs and feces                        | 17  | 1        | 5.9   |                              |    |          |     |
| Hipposideridae | <i>Doryrhina cyclops</i>        | Liver and spleen                            | 20  | 15       | 75.00 |                              |    |          |     |
|                | <i>Hipposideros armiger</i>     | Kindeg, feces, oropharyngeal and anal swabs | 487 | 5        | 1.0   | Oropharyngeal and anal swabs | 93 | 0        | 0.0 |
|                | <i>Hipposideros beatus</i>      | Liver and spleen                            | 2   | 0        | 0.0   |                              |    |          |     |
|                | <i>Hipposideros cineraceus</i>  | Oropharyngeal and anal swabs                | 40  | 0        | 0.0   | Oropharyngeal and anal swabs | 20 | 0        | 0.0 |
|                | <i>Hipposideros diadema</i>     |                                             |     |          |       | Spleen                       | 1  | 1        | 100 |
|                | <i>Hipposideros fuliginosus</i> | Liver and spleen                            | 3   | 0        | 0.0   |                              |    |          |     |
|                | <i>Hipposideros jonesi</i>      | Blood, spleen, liver, kindeg and thymus     | 2   | 0        | 0.0   |                              |    |          |     |

Table S5. Continue

| Family         | Species                          | AdVs                                                |     |          |      | HSVs                                                               |    |          |      |
|----------------|----------------------------------|-----------------------------------------------------|-----|----------|------|--------------------------------------------------------------------|----|----------|------|
|                |                                  | Samples                                             | n   | Positive | P %  | Samples                                                            | n  | Positive | P%   |
| Hipposideridae | <i>Hipposideros larvatus</i>     | Kidney, anal swabs and feces                        | 16  | 0        | 0.0  | Feces, oropharyngeal and anal swabs                                | 23 | 1        | 43.4 |
|                | <i>Hipposideros pomona</i>       | Kidney, feces, oropharyngeal and anal swabs         | 82  | 0        | 0.0  | Feces, oropharyngeal and anal swabs                                | 66 | 1        | 1.5  |
|                | <i>Hipposideros pratti</i>       |                                                     |     |          |      | Feces, oropharyngeal and anal swabs                                | 86 | 0        | 0.0  |
|                | <i>Hipposideros ruber</i>        | Blood, kidney, liver, spleen, thymus and anal swabs | 117 | 17       | 14.5 | Blood, spleen, liver, kidney, thymus, oropharyngeal and anal swabs | 11 | 0        | 0.0  |
|                | <i>Macronycteris commersonii</i> | Anal swabs                                          | 9   | 0        | 0.0  |                                                                    |    |          |      |
|                | <i>Macronycteris gigas</i>       | Liver and spleen                                    | 28  | 3        | 10.7 |                                                                    |    |          |      |
|                | <i>Neoromicia brunnea</i>        |                                                     |     |          |      | Oropharyngeal and anal swabs                                       | 4  | 0        | 0.0  |
|                | <i>Nycteris hispida</i>          |                                                     |     |          |      | Oropharyngeal and anal swabs                                       | 4  | 0        | 0.0  |
| Megadermatidae | <i>Cardioderma cor</i>           | Anal swabs                                          | 14  | 0        | 0.0  |                                                                    |    |          |      |
| Miniopteridae  | <i>Miniopterus africanus</i>     | Anal swabs                                          | 9   | 0        | 0.0  | Oropharyngeal and anal swabs                                       | 8  | 1        | 12.5 |
|                | <i>Miniopterus australis</i>     |                                                     |     |          |      | Spleen                                                             | 23 | 0        | 0.0  |
|                | <i>Miniopterus fuliginosus</i>   | Organs and feces                                    | 642 | 0        | 0.0  | Spleen                                                             | 50 | 4        | 8.0  |
|                | <i>Miniopterus inflatus</i>      | Liver, spleen and feces                             | 11  | 0        | 0.0  |                                                                    |    |          |      |

Table S5. Continue

| Family        | Species                         | AdVs                                                                                  |     |          |      | HSVs                                               |     |          |      |
|---------------|---------------------------------|---------------------------------------------------------------------------------------|-----|----------|------|----------------------------------------------------|-----|----------|------|
|               |                                 | Samples                                                                               | n   | Positive | P %  | Samples                                            | n   | Positive | P%   |
| Miniopteridae | <i>Miniopterus minor</i>        | Anal swabs                                                                            | 16  | 0        | 0.0  |                                                    |     |          |      |
|               | <i>Miniopterus natalensis</i>   | Urine, oropharyngeal and anal swabs                                                   | 274 | 70       | 25.5 | Salive, urine, feces, oropharyngeal and anal swabs | 273 | 19       | 6.9  |
|               | <i>Miniopterus orianae</i>      | Hisopados bucifaringeos                                                               | 213 | 0        | 0.0  | oropharyngeal swab                                 | 467 | 89       | 19.0 |
|               | <i>Miniopterus schreibersii</i> | Brain, salivary glands, heart, liver, intestine, kidney, spleen, feces and anal swabs | 397 | 1        | 0.3  | Spleen, feces, oropharyngeal and anal swabs        | 469 | 35       | 7.5  |
|               | <i>Miniopterus tristis</i>      |                                                                                       |     |          |      | Spleen                                             | 2   | 0        | 0.0  |
| Molossidae    | <i>Austronomus australis</i>    | Feces                                                                                 | 9   | 0        | 0.0  |                                                    |     |          |      |
|               | <i>Chaerephon pumilus</i>       | Liver, spleen and oropharyngeal and anal swabs                                        | 9   | 2        | 22.2 |                                                    |     |          |      |
|               | <i>Eumops bonariensis</i>       |                                                                                       |     |          |      | Oropharyngeal swab                                 | 1   | 0        | 0.0  |
|               | <i>Eumops glaucinus</i>         | Blood and oropharyngeal and anal swabs                                                | 2   | 0        | 0.0  | Blood, oropharyngeal and anal swabs                | 2   | 0        | 0.0  |
|               | <i>Molossops temminckii</i>     |                                                                                       |     |          |      | Oropharyngeal swab                                 | 2   | 1        | 50.0 |
|               | <i>Molossus coibensis</i>       |                                                                                       |     |          |      | Blood                                              | 17  | 2        | 11.7 |
|               | <i>Molossus molossus</i>        | Blood and oropharyngeal and anal swabs                                                | 3   | 0        | 0.0  | Blood, oropharyngeal and anal swabs                | 69  | 5        | 7.2  |

Table S5. Continue

| Family      | Species                       | AdVs                                |    |          |      | HSVs                                    |    |          |      |
|-------------|-------------------------------|-------------------------------------|----|----------|------|-----------------------------------------|----|----------|------|
|             |                               | Samples                             | n  | Positive | P %  | Samples                                 | n  | Positive | P%   |
| Molossidae  | <i>Molossus rufus</i>         |                                     |    |          |      | Oropharyngeal swab                      | 1  | 1        | 100  |
|             | <i>Mops condylurus</i>        | Liver and spleen                    | 25 | 3        | 12.0 | Blood, spleen, liver, kidney and thymus | 6  | 0        | 0.0  |
|             | <i>Mops demonstrator</i>      | Liver and spleen                    | 6  | 0        | 0.0  |                                         |    |          |      |
|             | <i>Otomops martiensseni</i>   | Hisopados rectales                  | 19 | 2        | 10.5 |                                         |    |          |      |
|             | <i>Otomops harrisoni</i>      |                                     |    |          |      | Oropharyngeal and anal swabs            | 22 | 0        | 0.0  |
|             | <i>Tadarida brasiliensis</i>  |                                     |    |          |      | Oropharyngeal swab                      | 28 | 25       | 89.2 |
|             | <i>Tadarida teniotis</i>      | Brain, intestine, viscera and feces | 1  | 1        | 1.0  | Oropharyngeal swab                      | 7  | 6        | 85.7 |
| Mormoopidae | <i>Mormoops megalophylla</i>  |                                     |    |          |      | Liver                                   | 1  | 0        | 0.0  |
|             | <i>Pteronotus alitonus</i>    |                                     |    |          |      | Blood                                   | 5  | 1        | 20   |
|             | <i>Pteronotus fulvus</i>      |                                     |    |          |      | Liver                                   | 7  | 0        | 0.0  |
|             | <i>Pteronotus mexicanus</i>   |                                     |    |          |      | Liver and anal swabs                    | 30 | 0        | 0.0  |
|             | <i>Pteronotus psilotis</i>    |                                     |    |          |      | Liver                                   | 2  | 0        | 0.0  |
|             | <i>Pteronotus rubiginosus</i> |                                     |    |          |      | Blood                                   | 15 | 0        | 0.0  |
| Nycteridae  | <i>Nycteris grandis</i>       | Liver and spleen                    | 16 | 1        | 0.0  |                                         |    |          |      |

Table S5. Continue

| Family         | Species                       | AdVs                                |     |          |      | HSVs                                    |     |          |     |
|----------------|-------------------------------|-------------------------------------|-----|----------|------|-----------------------------------------|-----|----------|-----|
|                |                               | Samples                             | n   | Positive | P %  | Samples                                 | n   | Positive | P%  |
| Nycteridae     | <i>Nycteris hispida</i>       | Liver and spleen                    | 4   | 1        | 25.0 |                                         |     |          |     |
|                | <i>Nycteris macrotis</i>      |                                     |     |          |      | Blood, spleen, liver, kidney and thymus | 2   | 0        | 0.0 |
|                | <i>Nycteris major</i>         | Liver and spleen                    | 1   | 0        | 0.0  |                                         |     |          |     |
|                | <i>Nycteris thebaica</i>      | Liver and spleen                    | 1   | 0        | 0.0  |                                         |     |          |     |
| Phyllostomidae | <i>Anoura geoffroyi</i>       |                                     |     |          |      | Blood, oropharyngeal and anal swabs     | 28  | 2        | 7.1 |
|                | <i>Artibeus fimbriatus</i>    | Blood, oropharyngeal and anal swabs | 34  | 0        | 0.0  | Blood, oropharyngeal and anal swabs     | 34  | 0        | 0.0 |
|                | <i>Artibeus fraterculus</i>   |                                     |     |          |      | Oropharyngeal swab                      | 5   | 0        | 0.0 |
|                | <i>Artibeus lituratus</i>     | Blood, oropharyngeal and anal swabs | 66  | 0        | 0.0  | Blood, oropharyngeal and anal swabs     | 69  | 1        | 1.4 |
|                | <i>Artibeus obscurus</i>      |                                     |     |          |      | Oropharyngeal swab                      | 4   | 0        | 0.0 |
|                | <i>Artibeus planirostris</i>  | Blood, oropharyngeal and anal swabs | 130 | 0        | 0.0  | Blood, oropharyngeal and anal swabs     | 152 | 5        | 3.2 |
|                | <i>Carollia perspicillata</i> | Blood, oropharyngeal and anal swabs | 55  | 0        | 0.0  | Blood, oropharyngeal and anal swabs     | 118 | 6        | 5.1 |
|                | <i>Chiroderma salvini</i>     |                                     |     |          |      | Oropharyngeal swab                      | 2   | 0        | 0.0 |
|                | <i>Chiroderma trinitatum</i>  |                                     |     |          |      | Oropharyngeal swab                      | 1   | 0        | 0.0 |
|                | <i>Choeroniscus minor</i>     |                                     |     |          |      | Oropharyngeal swab                      | 1   | 0        | 0.0 |

Table S5. Continue

| Family         | Species                          | AdVs                                                            |     |          |      | HSVs                                |     |          |      |
|----------------|----------------------------------|-----------------------------------------------------------------|-----|----------|------|-------------------------------------|-----|----------|------|
|                |                                  | Samples                                                         | n   | Positive | P %  | Samples                             | n   | Positive | P%   |
| Phyllostomidae | <i>Desmodus rotundus</i>         | Blood, lung, liver, kidney, feces, oropharyngeal and anal swabs | 107 | 15       | 14.0 | Blood, oropharyngeal and anal swabs | 338 | 215      | 63.6 |
|                | <i>Diaemus youngi</i>            | Blood, oropharyngeal and anal swabs                             | 2   | 0        | 0.0  | Blood, oropharyngeal and anal swabs | 10  | 5        | 50   |
|                | <i>Diphylla ecaudata</i>         |                                                                 |     |          |      | Blood and oropharyngeal swab        | 5   | 3        | 60   |
|                | <i>Glossophaga soricina</i>      | Blood, oropharyngeal and anal swabs                             | 1   | 0        | 0.0  | Blood, oropharyngeal and anal swabs | 6   | 4        | 66.7 |
|                | <i>Leptonycteris yerbabuenae</i> |                                                                 |     |          |      | Liver                               | 2   | 1        | 50   |
|                | <i>Lonchophylla thomasi</i>      |                                                                 |     |          |      | Blood                               | 1   | 1        | 100  |
|                | <i>Lonchorhina aurita</i>        |                                                                 |     |          |      | Oropharyngeal swab                  | 7   | 0        | 0.0  |
|                | <i>Phyllostomus discolor</i>     |                                                                 |     |          |      | Oropharyngeal swab                  | 1   | 0        | 0.0  |
|                | <i>Phyllostomus hastatus</i>     | Blood, oropharyngeal and anal swabs                             | 3   | 0        | 0.0  | Blood, oropharyngeal and anal swabs | 3   | 0        | 0.0  |
|                | <i>Rhinophylla pumilio</i>       |                                                                 |     |          |      | Oropharyngeal swab                  | 1   | 0        | 0.0  |
|                | <i>Sturnira angeli</i>           |                                                                 |     |          |      | Blood                               | 18  | 5        | 27.8 |
|                | <i>Sturnira lilium</i>           | Blood, oropharyngeal and anal swabs                             | 17  | 0        | 0.0  | Blood, oropharyngeal and anal swabs | 23  | 2        | 8.7  |
|                | <i>Sturnira tildae</i>           |                                                                 |     |          |      | Blood                               | 18  | 2        | 11.1 |
|                | <i>Vampyressa bidens</i>         |                                                                 |     |          |      | Oropharyngeal swab                  | 4   | 0        | 0.0  |
|                | <i>Vampyrodes caraccioli</i>     | Blood, oropharyngeal and anal swabs                             | 9   | 0        | 0.0  | Blood, oropharyngeal and anal swabs | 9   | 0        | 0.0  |
| Pteropodidae   | <i>Acerodon celebensis</i>       |                                                                 |     |          |      | Blood and tissue                    | 54  | 7        | 13   |
|                | <i>Casinycteris argynnis</i>     | Liver and spleen                                                | 2   | 0        | 0.0  |                                     |     |          |      |
|                | <i>Cynopterus brachyotis</i>     |                                                                 |     |          |      | Blood, intestine and lung           | 19  | 3        | 15.7 |
|                | <i>Cynopterus sphinx</i>         | Feces and anal swabs                                            | 61  | 8        | 13.1 | Feces                               | 60  | 10       | 16.7 |



Table S5. Continue

| Family       | Species                         | AdVs                                |      |          |       | HSVs                                                |      |          |      |
|--------------|---------------------------------|-------------------------------------|------|----------|-------|-----------------------------------------------------|------|----------|------|
|              |                                 | Samples                             | n    | Positive | P %   | Samples                                             | n    | Positive | P%   |
| Pteropodidae | <i>Dobsonia moluccensis</i>     |                                     |      |          |       | Tissue                                              | 17   | 6        | 35.3 |
|              | <i>Eidolon dupreanum</i>        |                                     |      |          |       | Oropharyngeal swab                                  | 9    | 9        | 100  |
|              | <i>Eidolon helvum</i>           | Liver, spleen, feces and anal swabs | 161  | 11       | 6.8   | Organs and urine                                    | 89   | 3        | 3.4  |
|              | <i>Eonycteris spelaea</i>       | Feces and anal swabs                | 1    | 0        | 0.0   |                                                     |      |          |      |
|              | <i>Epomophorus gambianus</i>    | Liver and spleen                    | 9    | 0        | 0.0   |                                                     |      |          |      |
|              | <i>Epomophorus wahlbergi</i>    | Anal swabs                          | 3    | 0        | 0.0   |                                                     |      |          |      |
|              | <i>Epomophorus pusillus</i>     |                                     |      |          |       |                                                     |      |          |      |
|              | <i>Epomops franqueti</i>        | Liver and spleen                    | 124  | 5        | 4.0   |                                                     |      |          |      |
|              | <i>Hypsignathus monstrosus</i>  | Liver and spleen                    | 4    | 1        | 25.0  |                                                     |      |          |      |
|              | <i>Lissonycteris angolensis</i> | Liver, spleen and anal swabs        | 31   | 2        | 6.5   |                                                     |      |          |      |
|              | <i>Macroglossus minimus</i>     | Liver and spleen                    |      |          |       | Blood, lung and intestine                           | 4    | 1        | 25   |
|              | <i>Megaloglossus woermanni</i>  | Liver and spleen                    | 108  | 14       | 13.0  |                                                     |      |          |      |
|              | <i>Micropteropus pusillus</i>   | Liver and spleen                    | 68   | 1        | 1.5   |                                                     |      |          |      |
|              | <i>Myonycteris torquata</i>     | Liver and spleen                    | 25   | 0        | 0.0   |                                                     |      |          |      |
|              | <i>Nanonycteris veldkampii</i>  | Liver and spleen                    | 3    | 0        | 0.0   |                                                     |      |          |      |
|              | <i>Ptenochirus jagori</i>       |                                     |      |          |       | Blood, intestine, lung and spleen                   | 8    | 5        | 62.5 |
|              | <i>Pteropus dasymallus</i>      | Kidney                              | 1    | 1        | 100.0 |                                                     |      |          |      |
|              | <i>Pteropus lylei</i>           | Lung, liver and small intestine     | 5    | 0        | 0.0   | Liver, lung, small intestine and oropharyngeal swab | 8    | 1        | 12.5 |
|              | <i>Pteropus medius</i>          | Urine, feces and oropharyngeal swab | 1902 | 197      | 10.4  | Throat, urine and feces                             | 1741 | 730      | 41.9 |
|              | <i>Pteropus vampyrus</i>        |                                     |      |          |       | Blood, upper eyelid biopsy and tissue               | 110  | 70       | 63.6 |

Table S5. Continue

| Family        | Species                          | AdVs                                                                                             |     |          |       | HSVs                                        |     |          |      |
|---------------|----------------------------------|--------------------------------------------------------------------------------------------------|-----|----------|-------|---------------------------------------------|-----|----------|------|
|               |                                  | Samples                                                                                          | n   | Positive | P %   | Samples                                     | n   | Positive | P%   |
| Pteropodidae  | <i>Rousettus aegyptiacus</i>     | Lung, liver, spleen, small intestine, feces, oropharyngeal and anal swabs                        | 400 | 15       | 3.8   | Saliva and oropharyngeal swab               | 393 | 28       | 7.1  |
|               | <i>Rousettus amplexicaudatus</i> |                                                                                                  |     |          |       | Blood, lung and intestine                   | 40  | 11       | 27.5 |
|               | <i>Rousettus leschenaultii</i>   | Kidney, liver, spleen, oropharyngeal and anal swabs                                              | 343 | 8        | 2.3   |                                             |     |          |      |
|               | <i>Scotonycteris zenkeri</i>     | Liver and spleen                                                                                 | 5   | 0        | 0.0   |                                             |     |          |      |
| Rhinolophidae | <i>Rhinolophus affinis</i>       | Kidney                                                                                           | 60  | 0        | 0.0   | Oropharyngeal and anal swabs                | 141 | 0        | 0.0  |
|               | <i>Rhinolophus alcyone</i>       | Liver and spleen                                                                                 | 5   | 4        | 80.0  |                                             |     |          |      |
|               | <i>Rhinolophus arcuatus</i>      |                                                                                                  |     |          |       | Spleen                                      | 1   | 0        | 0.0  |
|               | <i>Rhinolophus blythi</i>        | Feces and anal swabs                                                                             | 118 | 0        | 0.0   | Feces                                       | 103 | 17       | 16.5 |
|               | <i>Rhinolophus clivosus</i>      | Anal swabs                                                                                       | 5   | 0        | 0.0   |                                             |     |          |      |
|               | <i>Rhinolophus euryale</i>       | Brain, salivary glands, heart, liver, kidney, spleen and intestine                               | 52  | 10       | 19.2  | Oropharyngeal swab                          | 52  | 0        | 0.0  |
|               | <i>Rhinolophus ferrumequinum</i> | Brain, salivary glands, heart, liver, spleen, kidney, intestine and faces                        | 383 | 10       | 2.6   | Kidney, heces, oropharyngeal and anal swabs | 122 | 16       | 13.1 |
|               | <i>Rhinolophus fumigatus</i>     | Liver and spleen                                                                                 | 1   | 1        | 100.0 |                                             |     |          |      |
|               | <i>Rhinolophus hildebrandtii</i> | Anal swabs                                                                                       | 4   | 0        | 0.0   |                                             |     |          |      |
|               | <i>Rhinolophus hipposideros</i>  | Brain, salivary glands, heart, liver, kidney and spleen, intestine, feces and oropharyngeal swab | 30  | 1        | 3.33  | Oropharyngeal swab                          | 10  | 1        | 10.0 |

Table S5. Continue

| Family                  | Species                         | AdVs                                                                         |      |          |      | HSVs                                          |     |          |            |
|-------------------------|---------------------------------|------------------------------------------------------------------------------|------|----------|------|-----------------------------------------------|-----|----------|------------|
|                         |                                 | Samples                                                                      | n    | Positive | P %  | Samples                                       | n   | Positive | P%         |
| <b>Rhinolophidae</b>    | <i>Rhinolophus landeri</i>      | Liver and spleen                                                             | 8    | 0        | 0.0  | Oropharyngeal and anal swabs                  | 8   | 0        | 0.0        |
|                         | <i>Rhinolophus luctus</i>       | Kidney                                                                       | 1    | 0        | 0.0  |                                               |     |          |            |
|                         | <i>Rhinolophus macrotis</i>     | Kidney                                                                       | 4    | 0        | 0.0  | Oropharyngeal and anal swabs                  | 86  | 0        | 0.0        |
|                         | <i>Rhinolophus mehelyi</i>      | Oropharyngeal swab                                                           | 1    | 0        | 0.0  | Oropharyngeal swab                            | 1   | 0        | 0.0        |
|                         | <i>Rhinolophus pearsonii</i>    | Kidney                                                                       | 10   | 0        | 0.0  | Oropharyngeal and anal swabs                  | 84  | 0        | 0.0        |
|                         | <i>Rhinolophus pusillus</i>     | Spleen, kidney, intestine, feces, oropharyngeal and anal swabs               | 1028 | 36       | 3.5  | Lung, intestine, oropharyngeal and anal swabs | 162 | 0        | 0.0        |
|                         | <i>Rhinolophus rufus</i>        |                                                                              |      |          |      | Blood, lung and intestine                     | 1   | 1        | <b>100</b> |
|                         | <i>Rhinolophus sinicus</i>      | Kidney, feces and anal swabs                                                 | 100  | 0        | 0.0  | Oropharyngeal and anal swabs                  | 49  | 0        | 0.0        |
| <b>Rhinonycteridae</b>  | <i>Triaenops afer</i>           |                                                                              |      |          |      | Oropharyngeal and anal swabs                  | 4   | 0        | 0.0        |
|                         | <i>Triaenops persicus</i>       |                                                                              |      |          |      | Oropharyngeal and anal swabs                  | 10  | 1        | 10.0       |
| <b>Rhinopomatidae</b>   | <i>Rhinopoma hardwickii</i>     | feces and anal swabs                                                         | 29   | 0        | 0.0  |                                               |     |          |            |
|                         | <i>Rhinopoma microphyllum</i>   | Liver and spleen                                                             | 1    | 0        | 0.0  |                                               |     |          |            |
| <b>Vespertilionidae</b> | <i>Barbastella barbastellus</i> | Brain, lung, heart, salivary glands, liver, kidney, spleen, intestine, feces | 48   | 0        | 0.0  | Lung, Oropharyngeal swab                      | 5   | 0        | 0.0        |
|                         | <i>Barbastella beijingensis</i> |                                                                              |      |          |      | Oropharyngeal and anal swabs                  | 56  | 0        | 0.0        |
|                         | <i>Chalinolobus gouldii</i>     | Feces                                                                        | 232  | 41       | 17.7 |                                               |     |          |            |
|                         | <i>Chalinolobus morio</i>       | Feces                                                                        | 45   | 7        |      |                                               |     |          |            |

Table S5. Continue

| Family           | Species                         | AdVs                                                                                  |     |          |      | HSVs                                                                                           |     |          |      |
|------------------|---------------------------------|---------------------------------------------------------------------------------------|-----|----------|------|------------------------------------------------------------------------------------------------|-----|----------|------|
|                  |                                 | Samples                                                                               | n   | Positive | P %  | Samples                                                                                        | n   | Positive | P%   |
| Vespertilionidae | <i>Corynorhinus rafinesquii</i> | Brain, windpipe, heart, gastrointestinal tissue                                       | 3   | 1        | 33.3 |                                                                                                |     |          |      |
|                  | <i>Corynorhinus townsendii</i>  |                                                                                       |     |          |      |                                                                                                |     |          |      |
|                  | <i>Eptesicus capensis</i>       |                                                                                       |     |          |      |                                                                                                |     |          |      |
|                  | <i>Eptesicus diminutus</i>      |                                                                                       |     |          |      | Oropharyngeal swab                                                                             | 1   | 1        | 100  |
|                  | <i>Eptesicus furinalis</i>      |                                                                                       |     |          |      | Oropharyngeal swab                                                                             | 5   | 2        | 40.0 |
|                  | <i>Eptesicus fuscus</i>         |                                                                                       |     |          |      | Blood and organs                                                                               | 109 | 31       | 28.4 |
|                  | <i>Eptesicus isabellinus</i>    | Feces                                                                                 | 8   | 0        | 0.0  | Oropharyngeal swab                                                                             | 33  | 16       | 48.5 |
|                  | <i>Eptesicus japonensis</i>     | Feces                                                                                 | 30  | 0        | 0.0  |                                                                                                |     |          |      |
|                  | <i>Eptesicus nilssonii</i>      | Brain, salivary glands, lung, heart, spleen, liver, kidney and intestine.             | 20  | 1        | 5.0  | Brain, lung, heart, spleen, kidney, liver and intestine                                        | 12  | 0        | 0.0  |
|                  | <i>Eptesicus serotinus</i>      | Brain, salivary glands, lung, heart, liver, spleen, kidney, small intestine and feces | 77  | 9        | 14.1 | Brain, salivary gland, lung, heart, liver, spleen, kidney, small intestine, oropharyngeal swab | 32  | 12       | 37.5 |
|                  | <i>Falsistrellus mackenziei</i> | Feces                                                                                 | 11  | 0        | 0.0  |                                                                                                |     |          |      |
|                  | <i>Hypsugo crassulus</i>        |                                                                                       |     |          |      | Lung, liver, feces and oral swab                                                               | 8   | 0        | 0.0  |
|                  | <i>Hypsugo musciculus</i>       | Liver and spleen                                                                      | 4   | 1        | 25.0 |                                                                                                |     |          |      |
|                  | <i>Hypsugo savii</i>            | Brain, salivary glands, heart, lung, liver, kidney, spleen, intestine                 | 109 | 11       | 10.0 | Oropharyngeal swab                                                                             | 10  | 2        | 20.0 |
|                  | <i>Ia io</i>                    |                                                                                       |     |          |      | Oropharyngeal and anal swabs                                                                   | 57  | 0        | 0.0  |
|                  | <i>Kerivoula cuprosa</i>        | Liver and spleen                                                                      | 4   | 0        | 0.0  |                                                                                                |     |          |      |
|                  | <i>Lasiurus blossevillii</i>    | Blood, oropharyngeal and anal swabs                                                   | 1   | 0        | 0.0  | Blood, oropharyngeal and anal swabs                                                            | 1   | 0        | 0.0  |

Table S5. Continue

| Family           | Species                         | AdVs                                                                                          |    |          |      | HSVs                                |    |          |      |
|------------------|---------------------------------|-----------------------------------------------------------------------------------------------|----|----------|------|-------------------------------------|----|----------|------|
|                  |                                 | Samples                                                                                       | n  | Positive | P %  | Samples                             | n  | Positive | P%   |
| Vespertilionidae | <i>Miniopterus schreibersii</i> |                                                                                               |    |          |      |                                     |    |          |      |
|                  | <i>Murina hilgendorfi</i>       | Feces                                                                                         | 2  | 0        | 0.0  |                                     |    |          |      |
|                  | <i>Murina leucogaster</i>       |                                                                                               |    |          |      | Oropharyngeal and anal swabs        | 52 | 0        | 0.0  |
|                  | <i>Murina ussuriensis</i>       | Feces                                                                                         | 1  | 0        | 0.0  |                                     |    |          |      |
|                  | <i>Myotis albescens</i>         | Blood, oropharyngeal and anal swabs                                                           | 3  | 0        | 0.0  | Blood, oropharyngeal and anal swabs | 3  | 0        | 0.0  |
|                  | <i>Myotis alcathoe</i>          | Brain, salivary glands, heart, liver, kidney, spleen, intestine and feces                     | 4  | 0        | 0.0  | Oropharyngeal swab                  | 1  | 1        | 100  |
|                  | <i>Myotis altarium</i>          |                                                                                               |    |          |      | Oropharyngeal and anal swabs        | 43 | 0        | 0.0  |
|                  | <i>Myotis bechsteinii</i>       | Brain, salivary glands, heart, liver, kidney, spleen, intestine, oropharyngeal swabs          | 40 | 1        | 0.0  | Spleen and oropharyngeal swab       | 4  | 2        | 50.0 |
|                  | <i>Myotis blythii</i>           | Brain, salivary glands, heart, liver, kidney, spleen, intestine, oropharyngeal and anal swabs | 63 | 1        | 14.3 | Feces and oropharyngeal swab        | 33 | 6        | 18.2 |
|                  | <i>Myotis brandtii</i>          | Brain, salivary glands, heart, liver, kidney, spleen and intestine                            | 7  | 0        | 0.0  | Oropharyngeal and anal swabs        | 12 | 0        | 0.0  |
|                  | <i>Myotis capaccinii</i>        | Oropharyngeal swab                                                                            | 15 | 0        | 0.0  | Oropharyngeal swab                  | 15 | 3        | 20   |
|                  | <i>Myotis chinensis</i>         | Kidney                                                                                        | 3  | 0        | 0.0  |                                     |    |          |      |

Table S5. Continue

| Family           | Species                     | AdVs                                                                                                       |     |          |      | HSVs                                                |    |          |      |
|------------------|-----------------------------|------------------------------------------------------------------------------------------------------------|-----|----------|------|-----------------------------------------------------|----|----------|------|
|                  |                             | Samples                                                                                                    | n   | Positive | P %  | Samples                                             | n  | Positive | P%   |
| Vespertilionidae | <i>Myotis dasycneme</i>     | Brain, salivary glands, heart, liver, kidney, spleen and intestine                                         | 5   | 2        | 40.0 |                                                     |    |          |      |
|                  | <i>Myotis daubentoni</i>    | Brain, salivary glands, heart, lung, liver, kidney, spleen, intestine, feces and oropharyngeal swab        | 332 | 0        | 0.0  | Lung, spleen, salivary gland and oropharyngeal swab | 86 | 12       | 14   |
|                  | <i>Myotis davidii</i>       | Kidney                                                                                                     | 2   | 0        | 0.0  | Oropharyngeal and anal swabs                        | 12 | 0        | 0.0  |
|                  | <i>Myotis emarginatus</i>   | Brain, salivary glands, heart, lung, liver, kidney, spleen, intestine, feces, oropharyngeal and anal swabs | 70  | 4        | 5.7  | Oropharyngeal swab                                  | 31 | 7        | 22.6 |
|                  | <i>Myotis escalerae</i>     | Oropharyngeal swab                                                                                         | 13  | 0        | 0.0  | Oropharyngeal swab                                  | 17 | 9        | 52.9 |
|                  | <i>Myotis fimbriatus</i>    | Spleen, intestine and anal swabs                                                                           | 54  | 19       | 35.2 | Anal swab                                           | 20 | 1        | 5.0  |
|                  | <i>Myotis formosus</i>      |                                                                                                            |     |          |      | Oropharyngeal and anal swabs                        | 8  | 0        | 0.0  |
|                  | <i>Myotis horsfieldii</i>   | Kidney                                                                                                     | 8   | 2        | 25.0 |                                                     |    |          |      |
|                  | <i>Myotis ikonnikovi</i>    | Feces                                                                                                      | 7   | 0        | 0.0  | Oropharyngeal and anal swabs                        | 68 | 0        | 0.0  |
|                  | <i>Myotis lucifugus</i>     |                                                                                                            |     |          |      | Submandibular gland and feces                       | 34 | 2        | 5.9  |
|                  | <i>Myotis macrodactylus</i> | Feces                                                                                                      | 1   | 0        | 0.0  |                                                     |    |          |      |
|                  | <i>Myotis macrotarsus</i>   |                                                                                                            |     |          |      | Spleen                                              | 1  | 0        | 0.0  |

| Family                  | Species                  | AdVs                                                                                                             |     |          |      | HSVs                                                                                                           |    |          |           |
|-------------------------|--------------------------|------------------------------------------------------------------------------------------------------------------|-----|----------|------|----------------------------------------------------------------------------------------------------------------|----|----------|-----------|
|                         |                          | Samples                                                                                                          | n   | Positive | P %  | Samples                                                                                                        | n  | Positive | P%        |
| <b>Vespertilionidae</b> | <i>Myotis myotis</i>     | Brain, salivary glands,<br>heart, liver, kidney,<br>spleen, intestine and<br>feces                               | 154 | 4        | 2.5  | Brain, salivary gland,<br>lung, heart, liver, kidney,<br>spleen, intestine,<br>oropharyngeal and anal<br>swabs | 76 | 10       | 13.2      |
|                         | <i>Myotis mystacinus</i> | Brain, salivary glands,<br>heart, lung, liver, kidney,<br>spleen, intestine, feces<br>and oropharyngeal<br>swabs | 43  | 1        | 2.3  | Brain, salivary gland,<br>lung, heart, kidney,<br>spleen, liver and<br>oropharyngeal swab                      | 34 | 3        | 8.8       |
|                         | <i>Myotis nattereri</i>  | Brain, salivary glands,<br>heart, liver, kidney,<br>spleen, intestine, feces<br>and oropharyngeal<br>swabs       | 56  | 0        | 4.8  | Brain, salivary gland,<br>lung, heart, liver, spleen,<br>kidney and intestine.                                 | 5  | 1        | <b>20</b> |
|                         | <i>Myotis nigricans</i>  | Blood, oropharyngeal<br>and anal swabs                                                                           | 1   | 0        | 0.0  | Blood, oropharyngeal<br>and anal swabs                                                                         | 1  | 0        | 0.0       |
|                         | <i>Myotis oxyotus</i>    |                                                                                                                  |     |          |      | Feces, oropharyngeal<br>swab                                                                                   | 11 | 3        | 27.3      |
|                         | <i>Myotis pequinius</i>  | Spleen and intestine                                                                                             | 57  | 5        | 8.7  | Oropharyngeal and anal<br>swabs                                                                                | 42 | 0        | 0.0       |
|                         | <i>Myotis pilosus</i>    | Kidney, spleen, intestine,<br>oropharyngeal and anal<br>swabs                                                    | 133 | 22       | 16.5 | Feces, oropharyngeal and<br>anal swabs                                                                         | 97 | 2        | 2.1       |
|                         | <i>Myotis pruinusus</i>  | Feces                                                                                                            | 2   | 0        | 0.0  |                                                                                                                |    |          |           |
|                         | <i>Myotis riparius</i>   | Blood, oropharyngeal<br>and anal swabs                                                                           | 3   | 0        | 0.0  | Blood, oropharyngeal<br>and anal swabs                                                                         | 3  | 0        | 0.0       |

Table S5. Continue

| Family           | Species                       | AdVs                                                                                                       |     |          |      | HSVs                                                                                              |     |          |      |
|------------------|-------------------------------|------------------------------------------------------------------------------------------------------------|-----|----------|------|---------------------------------------------------------------------------------------------------|-----|----------|------|
|                  |                               | Samples                                                                                                    | n   | Positive | P %  | Samples                                                                                           | n   | Positive | P%   |
| Vespertilionidae | <i>Myotis siligorensis</i>    | Oropharyngeal and anal swabs                                                                               | 40  | 0        | 0.0  |                                                                                                   |     |          |      |
|                  | <i>Myotis tricolor</i>        |                                                                                                            |     |          |      | Oropharyngeal and anal swabs                                                                      | 9   | 0        | 0.0  |
|                  | <i>Myotis velifer</i>         | Feces                                                                                                      | 30  | 6        | 20.0 | /                                                                                                 | 1   | 1        | 100  |
|                  | <i>Myotis yumanensis</i>      |                                                                                                            |     |          |      |                                                                                                   |     |          |      |
|                  | <i>Neoromicia capensis</i>    | Liver, spleen, intestine, rectum and feces                                                                 | 34  | 0        | 0.0  | Intestine, rectum and feces                                                                       | 33  | 0        | 0.0  |
|                  | <i>Neoromicia helios</i>      | Intestine, rectum and feces                                                                                | 5   | 0        | 0.0  | Intestine, rectum and feces                                                                       | 6   | 2        | 33.3 |
|                  | <i>Neoromicia nana</i>        | Intestine, rectum and feces                                                                                | 11  | 0        | 0.0  | Intestine, rectum and feces                                                                       | 12  | 0        | 0.0  |
|                  | <i>Neoromicia tenuipinnis</i> | Liver and spleen                                                                                           | 11  | 5        | 45.5 |                                                                                                   |     |          |      |
|                  | <i>Neoromicia zuluensis</i>   | Intestine, rectum and feces                                                                                | 4   | 0        | 0.0  | Intestine, rectum and feces                                                                       | 4   | 0        | 0.0  |
|                  | <i>Nyctalus lasiopterus</i>   | Brain, salivary glands, heart, liver, kidney, spleen intestine,                                            | 183 | 16       | 8.7  | Oropharyngeal swab                                                                                | 3   | 3        | 100  |
|                  | <i>Nyctalus leisleri</i>      | Brain, salivary glands, heart, lung, liver, kidney, spleen, intestine, feces, oropharyngeal and anal swabs | 52  | 9        | 17.3 | Lung and oropharyngeal swab                                                                       | 9   | 6        | 66.7 |
|                  | <i>Nyctalus noctula</i>       | Brain, salivary glands, lung, heart, liver, kidney, spleen, intestine, feces oropharyngeal swab            | 277 | 31       | 11.1 | Brain, salivary gland, lung, heart, liver, kidney, spleen, small intestine and oropharyngeal swab | 227 | 48       | 21.1 |
|                  | <i>Nyctophilus geoffroyi</i>  | Feces                                                                                                      | 51  | 2        | 3.9  |                                                                                                   |     |          |      |



Table S5. Continue

| Family           | Species                          | AdVs                                                                                                |     |          |      | HSVs                                                                                              |    |          |      |
|------------------|----------------------------------|-----------------------------------------------------------------------------------------------------|-----|----------|------|---------------------------------------------------------------------------------------------------|----|----------|------|
|                  |                                  | Samples                                                                                             | n   | Positive | P %  | Samples                                                                                           | n  | Positive | P%   |
| Vespertilionidae | <i>Nyctophilus gouldi</i>        | Feces                                                                                               | 56  | 1        | 1.7  |                                                                                                   |    |          |      |
|                  | <i>Nyctophilus major</i>         | Feces                                                                                               | 10  | 0        | 0.0  |                                                                                                   |    |          |      |
|                  | <i>Perimyotis subflavus</i>      |                                                                                                     |     |          |      | Feces                                                                                             | 4  | 0        | 0.0  |
|                  | <i>Pipistrellus abramus</i>      | Feces and anal swabs                                                                                | 12  | 2        | 16.7 |                                                                                                   |    |          |      |
|                  | <i>Pipistrellus kuhlii</i>       | Brain, salivary glands, heart, lung, liver, kidney, spleen, intestine and feces                     | 465 | 24       | 5.1  | Lung and oropharyngeal swab                                                                       | 9  | 5        | 55.6 |
|                  | <i>Pipistrellus nanulus</i>      | Liver and spleen                                                                                    | 2   | 0        | 0.0  | Oropharyngeal and anal swabs                                                                      | 4  | 1        | 25.0 |
|                  | <i>Pipistrellus nathusii</i>     | Brain, salivary glands, lung, heart, liver, kidney, spleen, intestine and feces                     | 45  | 2        | 4.4  | Brain, salivary gland, lung, heart, liver, kidney, spleen and intestine                           | 23 | 8        | 34.8 |
|                  | <i>Pipistrellus pipistrellus</i> | Brain, salivary glands, lung, heart, liver, kidney, spleen, intestine and feces                     | 167 | 10       | 5.9  | Brain, salivary gland, lung, heart, liver, kidney, spleen, intestine and oropharyngeal swab       | 78 | 35       | 44.9 |
|                  | <i>Pipistrellus pygmaeus</i>     | Brain, salivary glands, lung, heart, liver, kidney, spleen, intestine and feces                     | 169 | 22       | 13.0 | Spleen, intestine and oropharyngeal swab                                                          | 2  | 1        | 0.5  |
|                  | <i>Pipistrellus tenuis</i>       | Feces and anal swabs                                                                                | 13  | 0        | 0.0  |                                                                                                   |    |          |      |
|                  | <i>Plecotus auritus</i>          | Brain, salivary glands, lung, heart, liver, kidney, spleen, intestine, feces and oropharyngeal swab | 56  | 1        | 1.8  | Brain, salivary gland, lung, heart, liver, kidney, spleen, intestine oropharyngeal and anal swabs | 67 | 3        | 4.5  |

Table S5. Continue

| Family           | Species                       | AdVs                                                                               |     |          |      | HSVs                                                    |     |          |      |
|------------------|-------------------------------|------------------------------------------------------------------------------------|-----|----------|------|---------------------------------------------------------|-----|----------|------|
|                  |                               | Samples                                                                            | n   | Positive | P %  | Samples                                                 | n   | Positive | P%   |
| Vespertilionidae | <i>Plecotus austriacus</i>    | Brain, salivary glands, heart, liver, kidney, spleen, feces and oropharyngeal swab | 19  | 0        | 0.0  | Oropharyngeal swab                                      | 11  | 9        | 81.8 |
|                  | <i>Plecotus macrobullaris</i> | Organs                                                                             | 1   | 0        | 0.0  |                                                         |     |          |      |
|                  | <i>Plecotus sacrimontis</i>   | Feces                                                                              | 5   | 0        | 0.0  |                                                         |     |          |      |
|                  | <i>Scotophilus kuhlii</i>     | Feces and anal swabs                                                               | 193 | 24       | 12.4 | Feces                                                   | 177 | 37       | 20.9 |
|                  | <i>Scotorepens balstoni</i>   | Feces                                                                              | 9   | 0        | 0.0  |                                                         |     |          |      |
|                  | <i>Tylonycteris pachypus</i>  | Feces and anal swabs                                                               | 78  | 0        | 0.0  |                                                         |     |          |      |
|                  | <i>Tylonycteris robustula</i> |                                                                                    |     |          |      | Oropharyngeal and anal swabs                            | 20  | 0        | 0.0  |
|                  | <i>Vespadelus baverstocki</i> | Feces                                                                              | 4   | 0        | 0.0  |                                                         |     |          |      |
|                  | <i>Vespadelus regulus</i>     | Feces                                                                              | 141 | 11       | 7.8  |                                                         |     |          |      |
|                  | <i>Vespertilio murinus</i>    | Brain, salivary glands, lung, liver, kidney, spleen, intestine and feces           | 23  | 1        | 4.3  | Salivary gland, lung, spleen, liver and small intestine | 7   | 0        | 0.0  |
|                  | <i>Vespertilio sinensis</i>   | Feces                                                                              | 67  | 0        | 0.0  |                                                         |     |          |      |

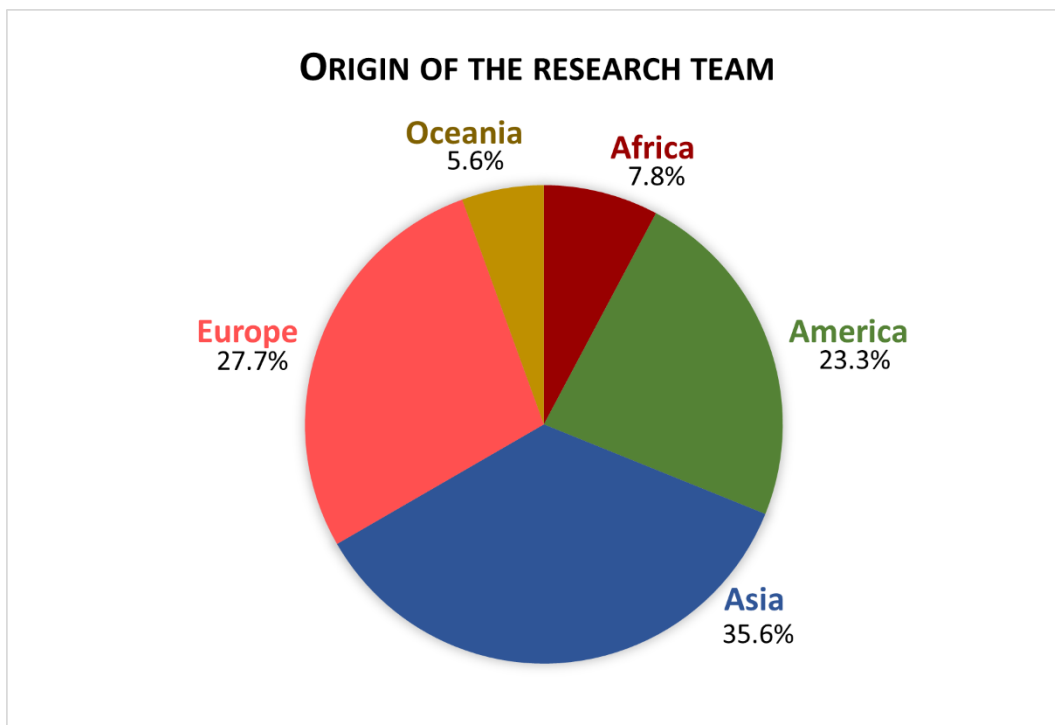

**Figure S1.** Continents of origin of research teams that have studied AdVs and HSVs in bats.

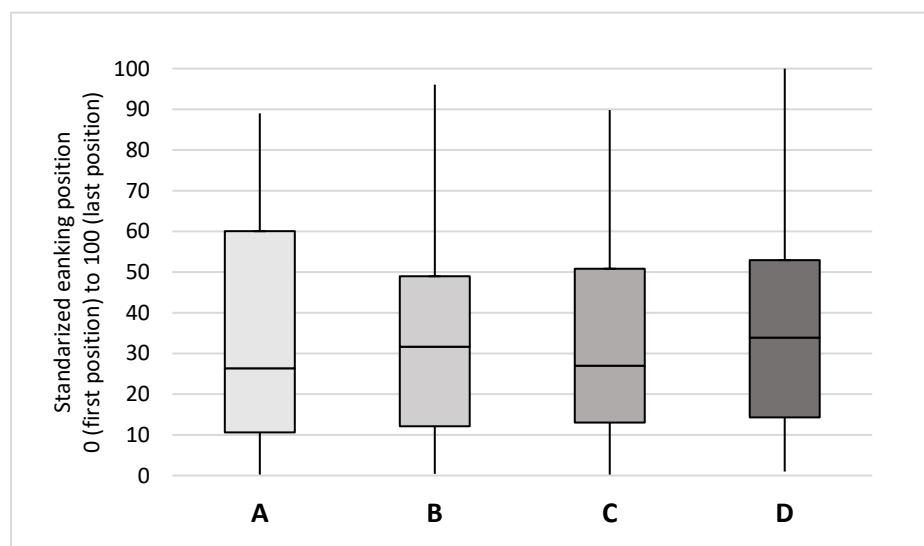

**Figure S2.** Violin plots representing A. all research outputs scored by Altmetric.com, B. all papers of the same journal, C. all papers of the same year and D. all papers of the same year and journal. Standardized ranking position is represented between 0 (first position) to 100 (last position).
